# Supplementary material for: Resistance to Spot Blotch in Two Mapping Populations of Common Wheat Is Controlled by Multiple QTL of Minor Effects
Source: PubMed Central journal article supplement (PMC6321084; doi:10.3390/ijms19124054), 2018-12-14
Supplement: ijms-19-04054-s001.pdf [file ijms-19-04054-s001.pdf]

**Table S1.** QTL for spot blotch resistance in the ‘BARTAI’ × ‘CIANO T79’ (BC) and ‘WUYA’ × ‘CIANO T79’ (WC) populations, using days to heading and plant height as covariates

|           | Linkage group                                 | Position                                      | Left marker | Right marker | 2013        | 2014       | 2015       | Mean       | R source <sup>a</sup> |
|-----------|-----------------------------------------------|-----------------------------------------------|-------------|--------------|-------------|------------|------------|------------|-----------------------|
| <b>BC</b> | 1B                                            | 0.4-5.5                                       | 995296      | 1000211      | 1.8         | <b>7.4</b> | <b>6.7</b> | <b>8.3</b> | C                     |
|           | 1B                                            | 215.8-218.6                                   | 2266964     | 1110815      | <b>3.5</b>  | <b>6.2</b> | <b>5.9</b> | <b>4.7</b> | B                     |
|           | 3A                                            | 103.2-146.0                                   | 1109808     | 990692       | <b>4.9</b>  |            |            |            | C                     |
|           | 3AL                                           | 28.8-32.0                                     | 987922      | 100199979    | 2.3         | 2          |            | <b>2.3</b> | B                     |
|           | 3B                                            | 65.6-71.3                                     | 1089285     | 1091357      |             |            | <b>4.1</b> | <b>2.5</b> | B                     |
|           | 5A                                            | 175.9-179.4                                   | Vrn-A1      | 3064415      | <b>9.7</b>  | <b>3.9</b> |            | <b>2.2</b> | B                     |
|           | 5B                                            | 142.1-142.9                                   | 3028824     | 1108969      |             |            | <b>3.2</b> |            | B                     |
|           | 6D                                            | 4.3-33.2                                      | 5324990     | 1095962      |             | 1.8        | <b>3.4</b> | 2          | B                     |
|           | 7A2                                           | 8.3-12.8                                      | 1008884     | 1079791      | <b>3.1</b>  |            |            | 1.5        | C                     |
|           | Accumulated percentage of variation explained |                                               |             |              | 12.5        | 15.6       | 16.7       | 20         |                       |
| <b>WC</b> | 1B                                            | 232.3-252.9                                   | 1283166     | 2263671      | 2.2         | <b>8.3</b> | 2.5        | <b>5.1</b> | W                     |
|           | 2A                                            | 110.5-113.5                                   | 5579629     | 1094923      | 3           |            |            | 1.9        | W                     |
|           | 2D                                            | 1.1-3.2                                       | 9724392     | 1098973      | 2.8         | <b>3.1</b> |            | <b>2.4</b> | W                     |
|           | 4B                                            | 95.7-106.3                                    | 1092405     | 100199773    |             | <b>2.4</b> |            | <b>3.5</b> | W                     |
|           | 5A                                            | 145.7-158.7                                   | 100168681   | 1049519      | <b>12.5</b> | <b>6.6</b> | <b>6.8</b> | <b>6.3</b> | W                     |
|           |                                               | Accumulated percentage of variation explained |             |              |             | 20.5       | 20.4       | 9.3        | 19.2                  |

The percentage of explained phenotypic variation is shown in the table, QTL are listed if they were over the LOD threshold of 3 (in bold) in at least one environment or over the threshold of 2 in multiple environments. <sup>a</sup> B ‘BARTAI’, W ‘WUYA’, C ‘CIANO T79’

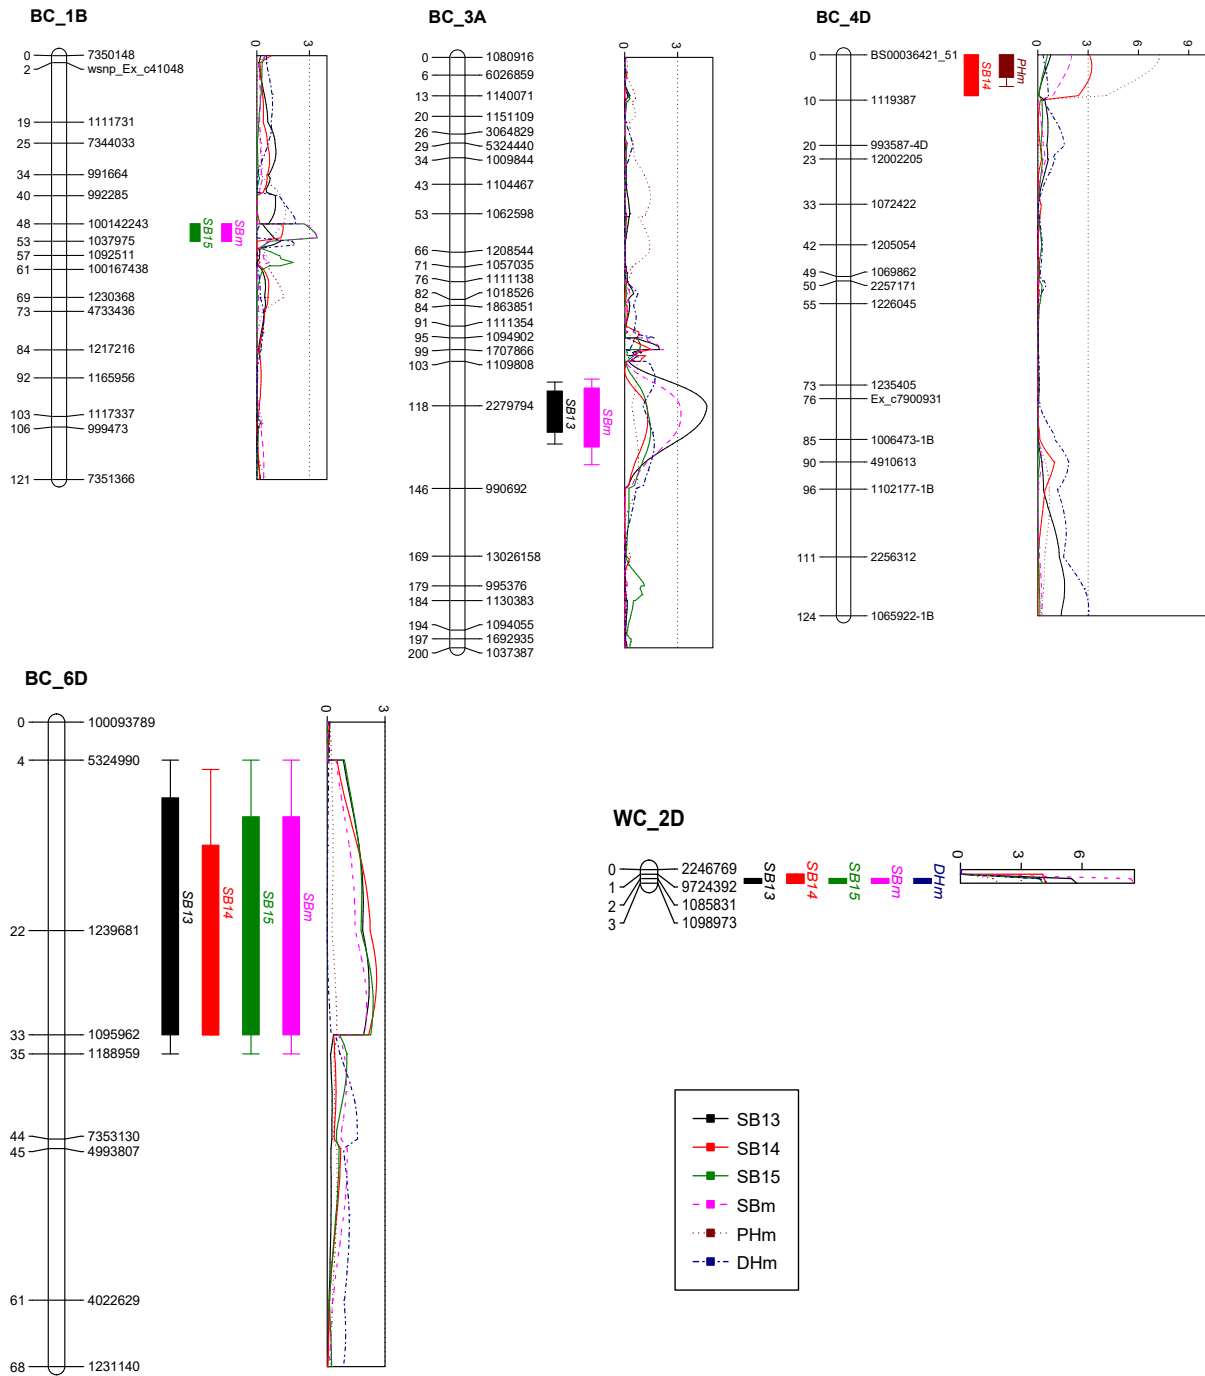

**Figure S1.** QTL profiles for spot blotch (SB), plant height (PH) and days to heading (DH) on chromosomes 1B, 3A, 4D and 6D in the ‘BARTAI’ × ‘CIANO79’ (BC) population and on chromosome 2D in the ‘WUYA’ × ‘CIANO79’ (WC) population. Genetic distances are shown in centimorgans to the left of the chromosomes. A threshold of 3.0 is indicated by a dashed vertical line in the LOD graphs. Only framework markers are presented except for the QTL regions.
